# Supplementary material for: Direct foliar phosphorus uptake from wildfire ash
Source: Copernicus journal article supplement (doi:10.5194/bg-21-2355-2024), 2024-05-16
Supplement: Supplementary file 1 [file bg-21-2355-2024-supplement.pdf]

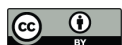

*Supplement of*

## **Direct foliar phosphorus uptake from wildfire ash**

**Anton Lokshin et al.**

*Correspondence to:* Anton Lokshin (lokshinanton@gmail.com)

The copyright of individual parts of the supplement might differ from the article licence.

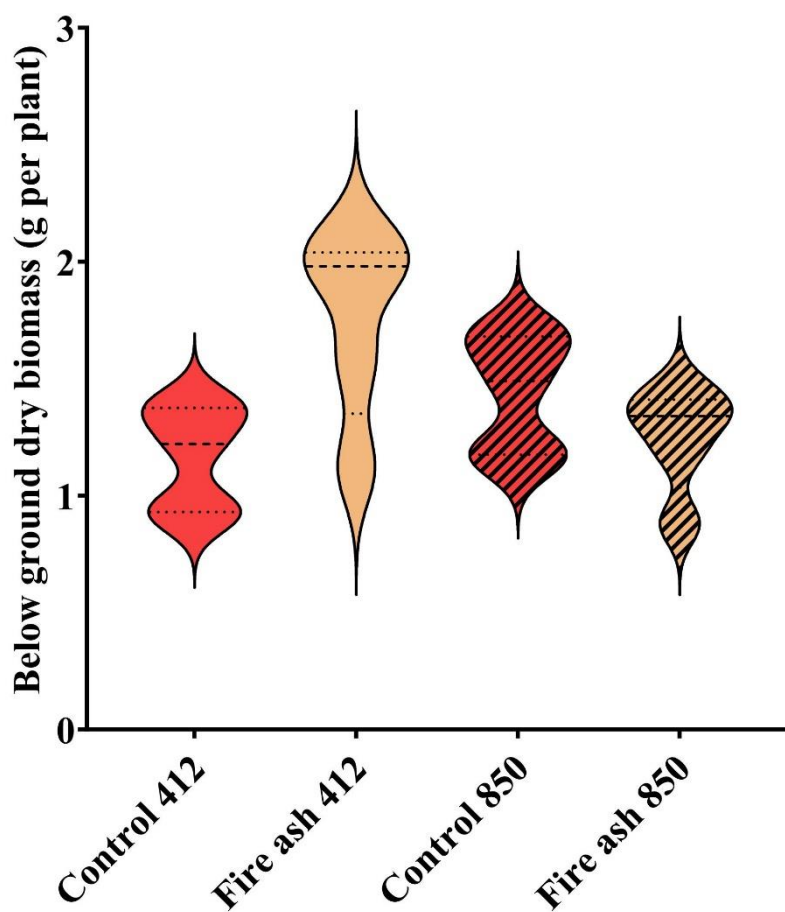

**Figure S1** Root biomass of control (red) and fire ash-treated (bright brown) plants grown under ambient (smooth) and elevated (pattern fill) CO<sub>2</sub> conditions. The number of plants in each group is 5.

**Table S1.** XRD (X-ray diffraction) and XRF (X-ray fluorescence) data of the fire ash particles. Major mineral composition (upper part,% weight, measured with XRD) and elemental content (lower part,% concentration, measured with XRF) of the fire ash analogue used in this study.

| <b>XRD - fire ash sample</b>                                                | <b>%</b> |
|-----------------------------------------------------------------------------|----------|
| Calcite (CaCO <sub>3</sub> )                                                | 80       |
| Hibschite ((Ca,Fe) <sub>3</sub> (Al,Fe) <sub>2</sub> SiO <sub>4</sub> (OH)) | 1.4      |
| Larnite/orthosilicate (Ca <sub>2</sub> (SiO <sub>4</sub> ))                 | 17.4     |
| Analcime (K <sub>8</sub> Al <sub>8</sub> Si <sub>16</sub> O <sub>48</sub> ) | 1.2      |
| Possible trace sulfates and/or phosphates                                   | <0.5%    |

| <b>XRF - fire ash sample</b> | <b>Conc.</b> |
|------------------------------|--------------|
| Element                      | (%)          |
| O                            | 31.8         |
| Na                           | 0.1          |
| Mg                           | 0.7          |
| Al                           | 1.3          |
| Si                           | 4.4          |
| P                            | 1.0          |
| S                            | 1.3          |
| Cl                           | 2.2          |
| K                            | 5.2          |
| Ca                           | 48           |
| Ti                           | 0.3          |
| Cr                           | 0.0          |
| Mn                           | 0.1          |
| Fe                           | 2.9          |
| Ni                           | 0.0          |
| Cu                           | 0.0          |
| Zn                           | 0.1          |
| Br                           | 0.0          |
| Rb                           | 0.0          |
| Sr                           | 0.2          |
| Zr                           | 0.0          |
| Ba                           | 0.0          |

**Table S2.** ICP-MS analysis of chickpea plants grown under ambient and elevated CO<sub>2</sub> levels, along with the fertilizers used for fertigation and the fire ash particles applied to both foliage and roots.

| <b>Foliar application experiment</b> |         |       |      |       |        |     |      |     |      |     |
|--------------------------------------|---------|-------|------|-------|--------|-----|------|-----|------|-----|
| <b>412 ppm chamber</b>               |         |       |      |       |        |     |      |     |      |     |
| sample (ppm)                         | Biomass | Mg    | P    | K     | Ca     | Mn  | Fe   | Ni  | Cu   | Zn  |
| Control 412 #1                       | 1.03    | 2749  | 715  | 21928 | 7257   | 52  | 75   | 1.3 | 2.9  | 23  |
| Control 412 #2                       | 1.29    | 2828  | 860  | 21147 | 7266   | 45  | 112  | 2.3 | 10.8 | 24  |
| Discarded plant                      |         |       |      |       |        |     |      |     |      |     |
| Control 412 #4                       | 1.51    | 2814  | 686  | 23832 | 7462   | 33  | 97   | 2.4 | 3.7  | 22  |
| Control 412 #5                       | 1.38    | 2863  | 663  | 21883 | 7684   | 38  | 94   | 1.0 | 2.7  | 24  |
| Control 412 #6                       | 1.61    | 2513  | 704  | 19705 | 6531   | 19  | 69   | 1.3 | 3.3  | 23  |
| <b>850 ppm chamber</b>               |         |       |      |       |        |     |      |     |      |     |
| Control 850 #1                       | 1.35    | 2585  | 727  | 23099 | 6323   | 22  | 71   | 1.0 | 1.9  | 23  |
| Control 850 #2                       | 1.16    | 3848  | 827  | 27768 | 7922   | 61  | 79   | 0.2 | 2.8  | 39  |
| Control 850 #3                       | 1.79    | 2785  | 607  | 20121 | 7118   | 50  | 67   | 1.2 | 2.5  | 25  |
| Discarded plant                      |         |       |      |       |        |     |      |     |      |     |
| Control 850 #5                       | 1.51    | 2847  | 759  | 27272 | 7572   | 21  | 88   | 2.2 | 4.7  | 26  |
| Control 850 #6                       | 1.68    | 3180  | 640  | 24460 | 8732   | 31  | 93   | 1.6 | 2.9  | 29  |
| <b>Root application experiment</b>   |         |       |      |       |        |     |      |     |      |     |
| <b>412 ppm chamber</b>               |         |       |      |       |        |     |      |     |      |     |
| sample (ppm)                         | Biomass | Mg    | P    | K     | Ca     | Mn  | Fe   | Ni  | Cu   | Zn  |
| Control 412 #1                       | 1.04    | 2993  | 862  | 20480 | 6808   | 64  | 118  | 1.7 | 5.7  | 37  |
| Control 412 #2                       | 1.95    | 5733  | 707  | 30854 | 10567  | 63  | 119  | 1.3 | 4.7  | 58  |
| Control 412 #3                       | 1.28    | 4865  | 567  | 29117 | 11069  | 57  | 123  | 2.0 | 7.4  | 64  |
| Control 412 #4                       | 1.46    | 4485  | 720  | 28665 | 10389  | 66  | 131  | 1.0 | 5.2  | 61  |
| Control 412 #5                       | 1.67    | 5666  | 740  | 29223 | 11566  | 104 | 101  | 0.9 | 5.0  | 64  |
| Discarded plant                      |         |       |      |       |        |     |      |     |      |     |
| <b>850 ppm chamber</b>               |         |       |      |       |        |     |      |     |      |     |
| Control 850 #1                       | 1.09    | 3747  | 762  | 27685 | 8279   | 58  | 98   | 0.2 | 3.4  | 49  |
| Lost sample                          |         |       |      |       |        |     |      |     |      |     |
| Discarded plant                      |         |       |      |       |        |     |      |     |      |     |
| Control 850 #4                       | 1.44    | 4741  | 820  | 31501 | 9608   | 62  | 77   | 0.2 | 3.2  | 55  |
| Control 850 #5                       | 1.46    | 3692  | 820  | 25098 | 7757   | 56  | 64   | 0.1 | 2.6  | 48  |
| Control 850 #6                       | 0.97    | 3015  | 712  | 19211 | 7511   | 37  | 69   | 0.1 | 2.6  | 35  |
| <b>Fertilizers and dust types</b>    |         |       |      |       |        |     |      |     |      |     |
| +P fertilizer                        |         | 1226  | 713  | 6000  | 10.6   | 76  | 151  | 0.4 | 5.6  | 50  |
| -P fertilizer                        |         | 1214  | 35   | 7808  | 6.7    | 70  | 136  | 0.4 | 5.1  | 48  |
| Fire ash sample 1                    |         | 22591 | 6070 | 23910 | 238430 | 510 | 7283 | 13  | 75   | 242 |
| Fire ash sample 2                    |         | 23152 | 6248 | 24542 | 245073 | 526 | 7508 | 14  | 78   | 244 |

**Table S3.** ICP-MS data of the foliar treated plants that were grown under elevated levels of CO<sub>2</sub> and received foliar treatment of fire ash particles.

| <b>412 ppm room</b>                |         |      |     |       |      |    |     |     |     |    |
|------------------------------------|---------|------|-----|-------|------|----|-----|-----|-----|----|
| sample (ppm)                       | Biomass | Mg   | P   | K     | Ca   | Mn | Fe  | Ni  | Cu  | Zn |
| Fire ash foliar-treated 412 ppm #1 | 2.35    | 2552 | 691 | 22993 | 7034 | 38 | 106 | 0.8 | 3.1 | 33 |
| Fire ash foliar-treated 412 ppm #2 | 2.24    | 2584 | 654 | 20730 | 7347 | 32 | 64  | 0.8 | 2.7 | 19 |
| Discarded plant                    |         |      |     |       |      |    |     |     |     |    |
| Fire ash foliar-treated 412 ppm #4 | 1.72    | 2173 | 660 | 18840 | 5879 | 31 | 65  | 0.9 | 2.7 | 21 |
| Fire ash foliar-treated 412 ppm #5 | 1.71    | 2534 | 746 | 20654 | 6904 | 38 | 88  | 1.7 | 2.9 | 23 |
| Fire ash foliar-treated 412 ppm #6 | 2.66    | 2285 | 642 | 21986 | 6732 | 44 | 114 | 1.3 | 4.5 | 19 |
| <b>850 ppm room</b>                |         |      |     |       |      |    |     |     |     |    |
| sample (ppm)                       | Biomass | Mg   | P   | K     | Ca   | Mn | Fe  | Ni  | Cu  | Zn |
| Fire ash foliar-treated 850 ppm #1 | 1.89    | 2458 | 590 | 22706 | 7151 | 47 | 93  | 1.4 | 2.5 | 20 |
| Fire ash foliar-treated 850 ppm #2 | 2.33    | 2407 | 623 | 23189 | 6929 | 41 | 82  | 0.6 | 2.7 | 18 |
| Fire ash foliar-treated 850 ppm #3 | 1.07    | 2510 | 751 | 22602 | 6849 | 24 | 57  | 0.9 | 2.4 | 23 |
| Fire ash foliar-treated 850 ppm #4 | 2.39    | 2084 | 586 | 20249 | 6200 | 31 | 98  | 1.2 | 3.4 | 19 |
| Discarded plant #5                 |         |      |     |       |      |    |     |     |     |    |
| Fire ash foliar-treated 850 ppm #6 | 1.54    | 2503 | 685 | 22349 | 7414 | 32 | 79  | 0.6 | 2.0 | 18 |

**Table S4.** ICP-MS data of the root treated plants that were grown under elevated levels of CO<sub>2</sub> and received foliar treatment of fire ash particles.

| <b>412 ppm room</b>              |         |      |     |       |       |    |     |     |      |    |
|----------------------------------|---------|------|-----|-------|-------|----|-----|-----|------|----|
| sample (ppm)                     | Biomass | Mg   | P   | K     | Ca    | Mn | Fe  | Ni  | Cu   | Zn |
| Fire ash root treated 412 ppm #1 | 1.21    | 3279 | 883 | 34888 | 7383  | 39 | 81  | 2.2 | 29.1 | 38 |
| Fire ash root treated 412 ppm #2 | 1.47    | 4059 | 489 | 27365 | 8318  | 42 | 77  | 1.2 | 53.1 | 37 |
| Fire ash root treated 412 ppm #3 | 1.59    | 4735 | 905 | 27677 | 8561  | 51 | 93  | 0.9 | 4.6  | 45 |
| Fire ash root treated 412 ppm #4 | 1.58    | 5071 | 619 | 33414 | 9820  | 49 | 84  | 0.9 | 4.8  | 49 |
| Fire ash root treated 412 ppm #5 | 1.33    | 5121 | 828 | 38921 | 11100 | 75 | 109 | 0.9 | 4.9  | 70 |
| Discarded plant                  |         |      |     |       |       |    |     |     |      |    |
| <b>850 ppm room</b>              |         |      |     |       |       |    |     |     |      |    |
| sample (ppm)                     | Biomass | Mg   | P   | K     | Ca    | Mn | Fe  | Ni  | Cu   | Zn |
| Discarded plant                  |         |      |     |       |       |    |     |     |      |    |
| Fire ash root treated 850 ppm #2 | 1.56    | 2687 | 640 | 26257 | 7146  | 50 | 67  | 0.2 | 2.9  | 39 |
| Fire ash root treated 850 ppm #3 | 1.44    | 3103 | 793 | 25534 | 7563  | 44 | 77  | 0.1 | 3.0  | 30 |
| Fire ash root treated 850 ppm #4 | 0.96    | 2239 | 689 | 20422 | 5736  | 30 | 68  | 0.1 | 2.1  | 23 |
| Fire ash root treated 850 ppm #5 | 1.21    | 2817 | 682 | 21645 | 6957  | 35 | 70  | 0.1 | 2.9  | 26 |
| Fire ash root treated 850 ppm #6 | 1.02    | 2465 | 662 | 23181 | 6889  | 36 | 86  | 0.2 | 2.7  | 26 |

Table S5 – pH measurements of chickpea leaves, with 3-4 leaves measured for pH from each plant.

| plant #       | number of leaves measured | pH values |
|---------------|---------------------------|-----------|
| plant #<br>1  | leaf 1                    | 1.11      |
|               | leaf 2                    | 1.25      |
|               | leaf 3                    | 1.2       |
|               | leaf 4                    | 1.1       |
| plant #<br>2  | leaf 1                    | 1.19      |
|               | leaf 2                    | 1.1       |
|               | leaf 3                    | 1.16      |
|               | leaf 4                    | 1.19      |
| plant #<br>3  | leaf 1                    | 1.11      |
|               | leaf 2                    | 1.18      |
|               | leaf 3                    | 1.11      |
|               | leaf 4                    | 1.26      |
| plant #<br>4  | leaf 1                    | 1.09      |
|               | leaf 2                    | 1.13      |
|               | leaf 3                    | 1.12      |
| plant #<br>5  | leaf 1                    | 0.99      |
|               | leaf 2                    | 1.23      |
|               | leaf 3                    | 1.25      |
| plant #<br>6  | leaf 1                    | 1.26      |
|               | leaf 2                    | 1.2       |
|               | leaf 3                    | 1.26      |
| plant #<br>7  | leaf 1                    | 1.26      |
|               | leaf 2                    | 1.2       |
|               | leaf 3                    | 1.26      |
| plant #<br>8  | leaf 1                    | 1.26      |
|               | leaf 2                    | 1.2       |
|               | leaf 3                    | 1.26      |
| plant #<br>9  | leaf 1                    | 1.26      |
|               | leaf 2                    | 1.2       |
|               | leaf 3                    | 1.26      |
| plant #<br>10 | leaf 1                    | 1.26      |
|               | leaf 2                    | 1.2       |
|               | leaf 3                    | 1.26      |
| plant #<br>11 | leaf 1                    | 1.26      |
|               | leaf 2                    | 1.2       |
|               | leaf 3                    | 1.26      |
| plant #<br>12 | leaf 1                    | 1.26      |
|               | leaf 2                    | 1.2       |
|               | leaf 3                    | 1.26      |
|               | leaf 4                    | 1.2       |
| plant #<br>13 | leaf 1                    | 1.25      |
|               | leaf 2                    | 1.13      |
|               | leaf 3                    | 1.12      |
| plant #<br>14 | leaf 1                    | 1.11      |
|               | leaf 2                    | 1.11      |
|               | leaf 3                    | 1.11      |
| plant #<br>15 | leaf 1                    | 1.04      |
|               | leaf 2                    | 1.04      |
|               | leaf 3                    | 1.18      |
| plant #<br>16 | leaf 1                    | 1.06      |
|               | leaf 2                    | 1.16      |
|               | leaf 3                    | 1.15      |

**Table S6.** Plant's holding capacity of fire ash particles.

| <b>Plant #</b> | <b>Number of branches tested</b> | <b>branch weight (~0.5 g) before fire ash application</b> | <b>branch weight after application of fire ash particles</b> | <b>total holding mass</b> |
|----------------|----------------------------------|-----------------------------------------------------------|--------------------------------------------------------------|---------------------------|
| plant # 1      | branch 1                         | 0.502                                                     | 0.618                                                        | 0.116                     |
|                | branch 2                         | 0.545                                                     | 0.666                                                        | 0.121                     |
|                | branch 3                         | 0.485                                                     | 0.586                                                        | 0.101                     |
| plant # 2      | branch 1                         | 0.511                                                     | 0.673                                                        | 0.162                     |
|                | branch 2                         | 0.499                                                     | 0.708                                                        | 0.209                     |
| plant # 3      | branch 1                         | 0.508                                                     | 0.662                                                        | 0.154                     |
|                | branch 2                         | 0.482                                                     | 0.597                                                        | 0.115                     |
| plant # 4      | branch 1                         | 0.433                                                     | 0.545                                                        | 0.112                     |
| plant # 5      | branch 1                         | 0.434                                                     | 0.524                                                        | 0.09                      |
| plant # 6      | branch 1                         | 0.453                                                     | 0.527                                                        | 0.074                     |
|                | branch 2                         | 0.481                                                     | 0.607                                                        | 0.126                     |
| plant # 7      | branch 1                         | 0.48                                                      | 0.63                                                         | 0.15                      |
|                | branch 2                         | 0.48                                                      | 0.65                                                         | 0.17                      |
| plant # 8      | branch 1                         | 0.525                                                     | 0.69                                                         | 0.165                     |
|                | branch 2                         | 0.49                                                      | 0.65                                                         | 0.16                      |
| plant # 9      | branch 1                         | 0.509                                                     | 0.645                                                        | 0.136                     |
|                | branch 2                         | 0.496                                                     | 0.644                                                        | 0.148                     |
|                | branch 3                         | 0.515                                                     | 0.675                                                        | 0.16                      |
| plant # 10     | branch 1                         | 0.512                                                     | 0.605                                                        | 0.093                     |
|                | branch 2                         | 0.526                                                     | 0.687                                                        | 0.161                     |
| plant # 11     | branch 1                         | 0.519                                                     | 0.641                                                        | 0.122                     |
|                | branch 2                         | 0.515                                                     | 0.642                                                        | 0.127                     |
| plant # 12     | branch 1                         | 0.506                                                     | 0.636                                                        | 0.13                      |
|                | branch 2                         | 0.525                                                     | 0.624                                                        | 0.099                     |
